# Supplementary material
Source: ML conference proceedings conference paper supplement (https://openreview.net/forum?id=2LpoMDXuJf)
Supplement: supplementary_material [file ReproducibilityStatement.pdf › ReproducibilityStatement.pdf]

## REPRODUCIBILITY STATEMENT

- We utilized open-source implementations of the selected DRL algorithms from public repositories (not including our technique):
  - AMIGO was from here: <https://github.com/facebookresearch/adversarially-motivated-intrinsic-goals>
  - BT is here: [https://github.com/andreneco/minigrid\\_bt](https://github.com/andreneco/minigrid_bt)
  - DQN, A2C, TRPO, and PPO were established on Stable Baselines3 (SB3)'s baselines repository (Raffin et al., 2021): <https://stable-baselines3.readthedocs.io/>
  - DreamerV3 was from here: <https://github.com/qxcv/dreamerv3>
  - All the other were from here: <https://github.com/sparisi/cbet>
- We used the the Minigrid package for the environments in our comparison, which is available here: <https://github.com/Farama-Foundation/Minigrid>
- For NACE we provide a stand-alone zip archive for reviewers to reproduce our results, which is runnable on a regular computer with Python interpreter. It includes a README.txt in the NACE folder, as well as scripts to generate the tables and the plots present in the paper.

## REFERENCES

Antonin Raffin, Ashley Hill, Adam Gleave, Anssi Kanervisto, Maximilian Ernestus, and Noah Dormann. Stable-baselines3: Reliable reinforcement learning implementations. *Journal of Machine Learning Research*, 22(268):1–8, 2021. URL <http://jmlr.org/papers/v22/20-1364.html>.
